# Supplementary material for: Visible light-induced photocatalytic degradation of gas-phase acetaldehyde with platinum/reduced titanium oxide-loaded carbon paper
Source: Royal Society of Chemistry journal article supplement (doi:10.1039/c7ra10778a), 2017-01-01
Supplement: c7ra10778a1.pdf [file c7ra10778a1.pdf]

## Supporting Information

# Visible light-induced photocatalytic degradation of gas-phase acetaldehyde with platinum/reduced titanium oxide-loaded carbon paper

Soonhyun Kim,<sup>a†</sup> Minsun Kim,<sup>a</sup> Ha-Young Lee,<sup>b</sup> Jong-Sung Yu<sup>b†</sup>

<sup>a</sup> Smart Textile Convergence Research Group, Daegu Gyeongbuk Institute of Science and  
Technology (DGIST), Daegu, 42988, Republic of Korea.

<sup>b</sup> Department Energy Science and Engineering, Daegu Gyeongbuk Institute of Science and  
Technology (DGIST), Daegu, 42988, Republic of Korea.

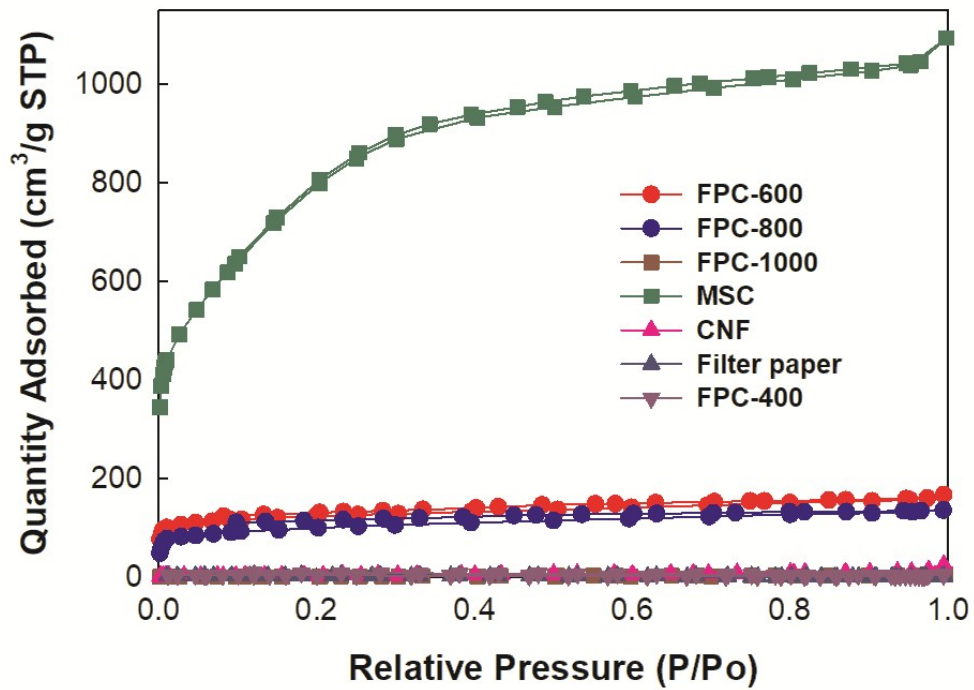

Fig. S1. N<sub>2</sub> adsorption–desorption isotherms of the filter paper and FPCs.

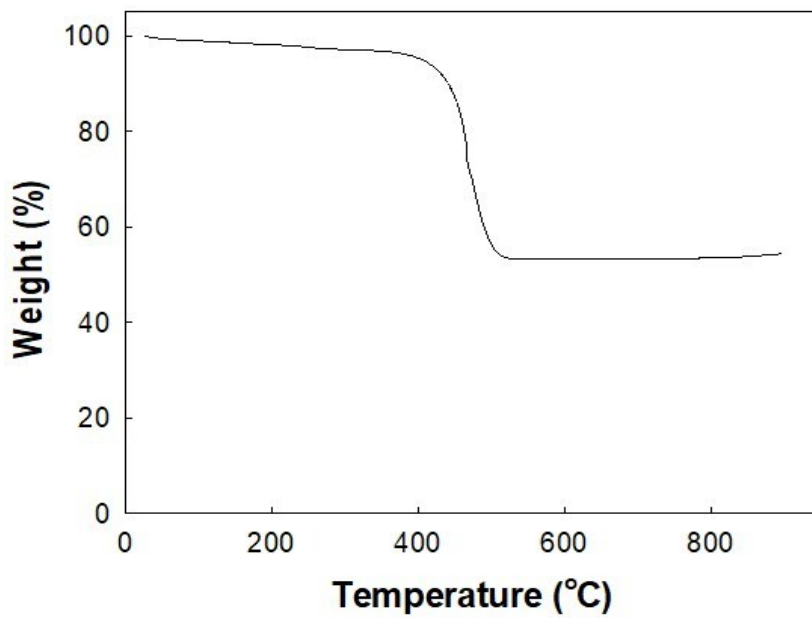

Fig. S2. Thermogravimetric analysis of Pt/tT-0.5 nanoparticles loaded FPC-600.

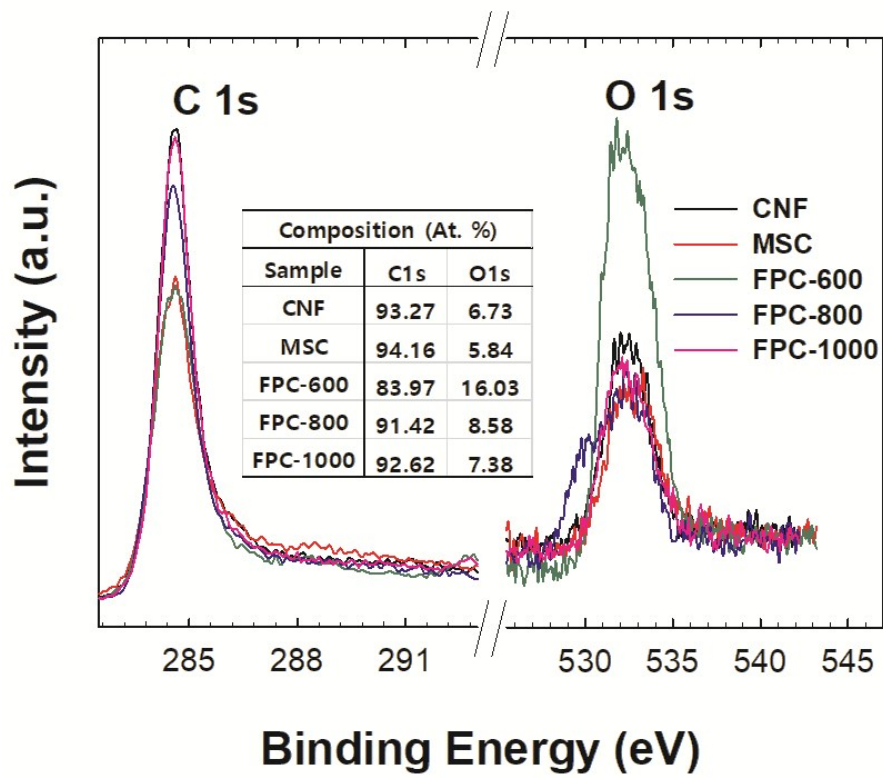

Fig. S3. XPS C 1s and O 1s spectra of FPCs. Inset: The surface composition (At. %) of FPCs.
